1

2

# Radiofrequency Monitoring of Intracranial Hemorrhage in the Neurological Intensive Care Unit: A Pilot Trial of the SENSE Device

3

4  
5 Joseph J. Korfhagen<sup>1</sup> PhD, George J. Shaw<sup>1,2,\*</sup> MD, PhD, Matthew L. Flaherty<sup>1,3</sup> MD  
6 Opeolu Adeoye<sup>1,4</sup> MD, William A. Knight<sup>4</sup> MD

7

8 <sup>1</sup>SENSE Diagnostics, Inc., Cincinnati, OH

9 <sup>2</sup>Department of Biomedical Engineering, University of Cincinnati, Cincinnati, OH

10 <sup>3</sup>Department of Neurology, University of Cincinnati, Cincinnati, OH

11 <sup>4</sup>Department of Emergency Medicine, University of Cincinnati, Cincinnati, OH

12 \*Corresponding Author, Email: gshaw@senseneuro.com

13 *Abstract*

14

15 Intracerebral hemorrhage (ICH) is a devastating form of stroke, with substantial mortality  
16 and morbidity. Hemorrhage expansion (HE) occurs in ~40% of patients and portends worse  
17 neurologic outcome and mortality. Currently, ICH patients are admitted to the intensive care unit  
18 (ICU) and monitored for HE with neurologic exam and neuroimaging. By the time a change is  
19 detected, it may be too late to mitigate HE. There is a clinical need for a non-invasive bedside  
20 monitor of ICH.

21 The SENSE consists of a 9-antenna array mounted around the head with driving  
22 electronics. A 913 MHz signal is transmitted by a given antenna, crosses the intracranial region,  
23 and received by the remaining 8 antennae. A complete measurement consists of one cycle with  
24 each antenna serving as the transmitting antenna. It was hypothesized that HE of  $\geq 3$  ml would  
25 be detected by the device.

26 Ten ICH subjects admitted within 24 hours of stroke onset were enrolled. All patients  
27 received a diagnostic head CT (baseline), and a repeat head CT at 12 (+/- 6) hours. ICH volumes  
28 were determined by blinded neuroradiologist reading, and a significant HE from baseline was  
29 considered  $\geq 3$  ml. Subjects were scanned with the device every 10 minutes for up to 72 hours.

30 Data from one subject was lost from operator error. Among the remaining nine, two  
31 experienced HE of  $\geq 3$ ml (3 and 8.2 ml respectively). SENSE device readings were 100%  
32 concordant with the CT scan results.

33

34 *Introduction*

35

36 Intracerebral hemorrhage (ICH) is a devastating form of stroke with mortality of 35 to  
37 52%. Only 20% of survivors experience full recovery by 6 months (1), and ICH prevalence is  
38 expected to rise with the aging population. Current therapy is predominantly supportive (2),  
39 although there have been encouraging early results from neuro-interventional trials (3, 4) of  
40 stereotactic thrombolysis and acute blood pressure control (Shi 2017). Other approaches include  
41 hemostatic agents and coagulation factors with mixed results to date (5).

42 Hemorrhage expansion (HE) in ICH is associated with worse neurologic outcome and increased  
43 mortality (6). Davis et al found that for every 1 ml increase in ICH volume, patients were 7%  
44 more likely to worsen from independence towards requiring assistance, and from assistance to  
45 poor outcome. HE is not uncommon, occurring in about 38% of ICH patients within 20 hours  
46 (7).

47 Currently, HE is detected by repeat neuroimaging with CT or MRI, and can lead to  
48 significant changes in patient management such as surgical intervention (8).  
49 Monitoring for HE after ICH is currently performed by clinical neurological exam and periodic  
50 neuroimaging. Clinical exam can be problematic in patients that are sedated and/or intubated.  
51 The exam can also lag serious intracranial events. In addition, at most institutions, the patient  
52 must be transported to radiology for the imaging which can take substantial time and risk.  
53 Finally, none of these techniques can be considered a continuous monitor of the brain and the  
54 hemorrhage. There are no current techniques or devices to provide continuous, non-invasive,  
55 bedside ICH monitoring in clinical practice.

56 The SENSE (Sensor Evaluation of Neurological Status in Emergencies) device was  
57 developed to address this clinical need. SENSE is a radiofrequency (RF) based technique  
58 utilizing the differential scattering and absorption of radio waves from intracranial tissues of

59 varying dielectric constant  $\epsilon$  and conductivity  $\sigma$  (9). Specifically, blood differs substantially in its  
60 electrical properties as compared with the grey and white matter of the brain (10). An RF signal  
61 incident on a blood collection of differing  $\epsilon$  and  $\sigma$  from the surrounding tissue induces a time  
62 oscillating electric dipole moment in the blood collection (11). This results in a signal generated  
63 by the blood collection at the same frequency  $f$  of the incident signal, but differing in phase and  
64 amplitude, depending on the differing electrical characteristics, location of the blood, and its  
65 volume. These combined signals can be measured, and used to determine the presence or  
66 absence of significant changes in blood volume over time.

67 The use of microwaves as a potential medical imaging modality has been under  
68 development for some time (Semenov 2009). In microwave tomography (MT), microwave  
69 signals are scattered from biological tissues. The scattered signal amplitudes are used as input  
70 data to invert Maxwell's equations, and obtain  $\epsilon$  as a function of position within the tissue.  
71 Limitations include low dielectric contrast between some soft tissues, and mathematical  
72 complexity in solving these equations to obtain  $\epsilon$ . Other approaches such as AI based analysis  
73 have been used in interpreting the scattered signals (Persson 2014) in more focused applications,  
74 such as the detection of acute stroke. Overall, these techniques have been focused on imaging or  
75 acute diagnosis of general brain pathology, and not as a monitor of changes in such pathology.

76 Korfhagen et al (Korfhagen 2013) demonstrated that a 400 MHz RF signal could detect  
77 as little as 1 ml of blood in a validated *in-vitro* brain gel model. They also found that the RF  
78 signal scattering was dependent on the geometry of the experimental blood collection. Kandadai  
79 et al (Kandadai 2014) demonstrated RF detection of 3 ml of blood in a porcine ICH preparation  
80 over a frequency range of 0.4-1 GHz. In addition, they found that the optimal RF frequency for  
81 intracranial blood detection was within 0.75 – 1 GHz range.

82 The overall goal of this study was to determine if SENSE could be used safely to monitor  
83 and detect ICH expansion in the Neurocritical Care unit. The secondary objective was to  
84 determine if SENSE could detect hemorrhage expansion of 3 ml or greater in these patients.

85

## 86 *Materials and Methods*

87

### 88 **Study Objectives**

89

90 The overall objective of this prospective, observational, single site, first-in-human pilot  
91 study of the SENSE device was to determine if SENSE could safely monitor ICH in the clinical  
92 environment. Up to 10 patients could be enrolled. Secondary objectives included human factors  
93 information to optimize the design, and operator challenges in the clinical environment. The  
94 results of the study were intended to guide further design changes for a planned pivotal clinical  
95 trial of the device.

96 The primary endpoint for this early feasibility study was the correlation of SENSE with  
97 CT changes over time. An expansion of 3 ml or more in a given ICH was considered significant.

98

### 99 **Study Population**

100

101 The study population was patients presenting with a diagnosis of spontaneous ICH to a  
102 single urban comprehensive stroke center (CSC). Emergency Department based Clinical  
103 Research Coordinators (CRC) screened for ICH patients at the study site. Patients were enrolled  
104 within 24 hours of symptom onset.

105 In order to be a candidate for the study, ICH patients were 22 years of age or older, with a  
106 diagnostic head CT performed within 24 hours of symptom onset, an ICH volume greater than or  
107 equal to 1 and less than 90 ml, and able to participate in study procedures. Potential subjects  
108 were excluded if pregnant or lactating, had a history of seizure disorder or were on medications  
109 that lowered the seizure threshold, had an intraventricular hemorrhage (IVH), subdural  
110 hemorrhage (SDH), epidural hemorrhage (EDH), or secondary cause of the ICH, if surgical ICH  
111 evacuation or continuous EEG monitoring was planned within 24 hours, or if taking medications  
112 that increased hemorrhage risk.

113 Patients were approached by CRCs after the screening process, and enrolled after  
114 appropriate written informed consent was obtained from the patient, or approved legal surrogate.  
115 Following subject enrollment, the SENSE device was placed on the patient for up to 72 hours.  
116 The device performed a scan every 10 minutes, and an individual scan took about 40 seconds.  
117 The SENSE data was recorded internally in the device, and later downloaded by study personnel  
118 after the monitoring period was complete for a given subject. The treating clinicians were  
119 blinded to the SENSE data.

120 For each subject, data recorded included basic subject demographic data, past medical  
121 history, and radiologist's interpretation of the neuroimaging studies. Adverse events (AE) and  
122 serious adverse events (SAEs) were noted and recorded.

123 The study protocol was approved by the FDA under and IDE and by the local IRB.

124

## 125 **Imaging Protocol**

126

127 The following CT imaging protocol was followed for each subject:

- 128 • Diagnosis: CT Scan 1 – standard of care; diagnostic head CT scan within 24 hours of  
129 symptom onset.
- 130 • First Study CT: CT Scan 2 – study CT; first study CT scan as soon as practicable after  
131 informed consent, followed by SENSE monitoring within 15 minutes of completion of  
132 the first CT scan.
- 133 • 12 Hours: CT Scan 3 – standard of care; CT scan 12 ( $\pm 6$ ) hours after first study CT scan.
- 134 • 72 Hours: CT Scan 4 – study CT; end of study CT scan 72 ( $\pm 12$ ) hours after first study  
135 CT scan.

136 Study eligibility ICH volumes were calculated from the diagnostic CT by clinical and/or research  
137 staff using the ABC method (12). Subsequently, ICH and edema volumes were determined by a  
138 neuroradiologist blinded to the clinical and SENSE device data. Quantification of volumes were  
139 performed using computer-assisted methods. The blinded evaluator was required to place seed-  
140 points within the volume of interest and adjust lower and upper intensity Hounsfield unit (HU)  
141 thresholds until the entire volume was correctly selected.

142

## 143 **SENSE Device**

144

145 The SENSE device was comprised of two segments; a headset worn by the patient  
146 (Figure 1), and the controlling electronics (not shown). These two items were connected by a  
147 semi-rigid cable. The headpiece contained 9 circular microwave patch antennae with an  
148 operating frequency of 913 MHz. The total power radiated for a given antenna when active was  
149 1 mW.

150 The antenna array was configured as 3 sagittal arrays of 3 antenna each; one in the  
151 midline of the patient's head, and the remaining on the left and right sides respectively. The  
152 antennae were offset from direct contact with a given subject's head by a foam insulating pad.  
153 All antennae were approximately oriented radially towards the center of the intracranial region.  
154 All patient-contacting materials and electronics underwent and passed approved biological and  
155 electronic safety testing prior to use.

156 For a given measurement, one antenna would transmit the incident signal, and the  
157 remaining 8 received the altered signal as modified by absorption and scattering from  
158 intracranial tissues. In a single measurement, all 9-antenna served as the transmitting antenna,  
159 thus yielding 72 total measurements. For a cycle, the measurement would be repeated for 10  
160 iterations. A single cycle took about 40 seconds. The data were stored on a secured internal hard  
161 drive of the driving electronics, and were downloaded by study personnel once data acquisition  
162 for the given patient was completed. Patients were scanned every 10 minutes during the study  
163 period.

## 164 **SENSE Data**

165  
166 Methods used in the SENSE algorithm were developed from in vitro and in vivo porcine  
167 experiments (9, 13). First, for each pair of antennae, the raw voltage data was compared to the  
168 first, or baseline, measurement. This value was denoted  $\Delta_{TR}$ , where T is the transmitting antenna  
169 and R is the receiving antenna. Then, for this time point, delta values for all pairs were  
170 compared. By comparing the delta values to a set of threshold values, the change was determined  
171 to be due to a change in the ICH volume, edema development, movement, or system drift. While  
172 the SENSE device can detect changes due to both increases and decreases (due to clot retraction)  
173 in hemorrhage size, only increases in hemorrhage volume greater than 3 mL were considered  
174 significant and were denoted as active bleeding.

## 175 *Results*

### 176 **Subjects**

177  
178 A total of 10 patients were enrolled from May through October 2017, and 9 completed  
179 the protocol. The average age was 57 years (range: 43-70), and there were 5 female subjects.  
180 Details of the ICH locations and volumes are shown in Table 1. Patients were monitored with  
181 SENSE for an average of 60 (range: 23-72) hours. There were no Serious Adverse Events.  
182 Adverse events were predominantly minor skin and nose irritation from the nosepiece of the  
183 headset.

### 184 **CTs**

185  
186 The initial head CT for these patients showed an average ICH volume of 24.5 (SD 19.7)  
187 ml. Of the 10 patients, 9 completed the protocol. The SENSE data for one patient was lost due to  
188 operator error of the device. Of the remaining 9 patients, 2 had a significant expansion of 3.0 and  
189 8.2 ml, respectively. The expansion for both patients occurred within 12 hours of onset, and was  
190 demonstrated on the 12-hour study CT.

191  
192  
193  
194  
195

196 **SENSE**

197

198 As shown in Table 1, the SENSE data was 100% concordant with the CT results. The  
199 SENSE signals showed significant changes in time for the two expansions, and did not show any  
200 such changes for the 7 patients who did not experience a hemorrhage expansion.

201

202 *Discussion*

203

204 In summary, the SENSE device was used to safely monitor ICH patients in a clinical  
205 environment. In addition, it was able to detect HE of  $\geq 3$  ml in this prospective, single-site pilot  
206 trial. Significant limitations include the small sample size  $n$  of 10 patients, and the single-site  
207 limits the generalizability of our results. However, these results are promising, and certainly  
208 warrant further study.

209 Currently, ICH patients are monitored by serial neurologic exam, and neuroimaging. In  
210 addition, intracranial pressure monitoring (ICP) is sometimes utilized in a subset of patients  
211 (Tuan 2013). However to the authors' knowledge, there are no non-invasive monitors of ICH in  
212 current clinical use. In addition, the clinical exam may be difficult in a sedated and/or paralyzed  
213 and intubated patient such that a neurological exam is not possible. Also HE can occur in such  
214 patients, and may not be detected for hours, depending on the schedule of neuroimaging. There is  
215 clearly a clinical need for such a monitor, and the results presented here suggest that RF  
216 monitoring may be a useful approach.

217

218 *Author Contributions Statement*

219

220 All authors planned and designed the study. JJ wrote the grant, obtained the data, and performed  
221 the data analysis. GJ performed data analysis and drafted the manuscript. OA and ML assisted in  
222 grant preparation, and reviewed the manuscript. WK assisted in study design, served as site PI,  
223 and reviewed the manuscript.

224

225 *Funding*

226

227 This work was funded by the National Science Foundation under grant SBIR Phase II 1632270.

228

229 *Conflicts*

230

231 JK is an employee of and owns shares of SENS Diagnostics, Inc.

232 GJ, OA and ML are co-inventors of a patent underlying the SENSE device, and owns shares in  
233 SENSE Diagnostics, Inc,

234 WK has no conflicts

235

236

237

238

239

240

241

242  
243  
244  
245  
246  
247  
248  
249  
250  
251  
252  
  
253  
  
254  
  
255  
  
256  
  
257  
  
258  
  
259  
  
260  
  
261  
  
262  
  
263  
  
264  
  
265  
  
266  
  
267  
  
268  
  
269  
  
270  
  
271  
  
272

273

274

275

276

277

278

279

280

281

282



283

284

285

286 **Table 1: ICH Characteristics**

| <b>ICH Location</b>                    | <b>Initial V (ml)</b> | <b>V (12 h)</b> | <b>V (72 h)</b> | <b>12 h ICH Expansion</b> |
|----------------------------------------|-----------------------|-----------------|-----------------|---------------------------|
| R BG,Thalamus                          | 1                     | 1               |                 |                           |
| L BG, Thalamus, IC                     | 3.8                   | 3.8             | 3.2             |                           |
| L Lobar                                | 20.2                  | 20.6            | 18              |                           |
| BG                                     | 22                    | 25              | 20              | Y                         |
| R Lobar                                | 35.1                  | 33.4            | 30.4            |                           |
| L BG, thalamus, IC                     | 24.8                  | 23.5            | 18.3            |                           |
| R BS, Cerebellar                       | 12.7                  | 20.9            |                 | Y                         |
| L BG                                   | 12.3                  | 11.3            | 11.2            |                           |
| L Lobar                                | 61.4                  | 59.5            | 51.7            |                           |
| L BG, Thalamus, IC,<br>Caudate Nucleus | 51.5                  | 50.4            | 48.9            |                           |

287

288

289

290 **Figure 1:** SENSE headset piece (controlling electronics not shown). The antenna array (9 total)  
291 is contained within the headpiece, along with appropriate wiring. The antenna signals are input  
292 and output via a cable (not shown) that communicates with the control box.

293

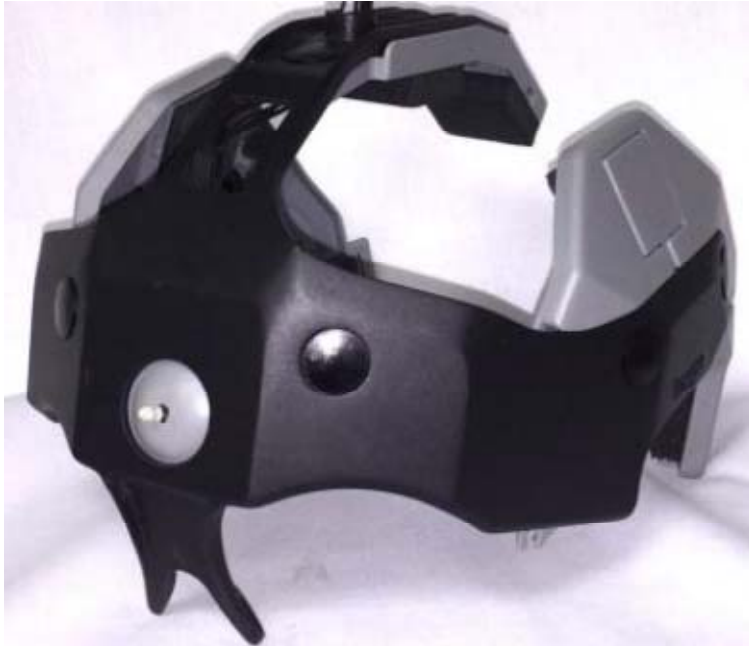

294

295

296

297

298

299

300

301

302

303

304

305

306

307

308

309 **References**

310 1. Caceres JA, Goldstein JN. Intracranial hemorrhage. *Emerg Med Clin North Am.* 2012;30(3):771-  
311 94.

312 2. Dastur CK, Yu W. Current management of spontaneous intracerebral haemorrhage. *Stroke and*  
313 *Vascular Neurology.* 2017;2(1):21.

314 3. Hersh EH, Gologorsky Y, Chartrain AG, Mocco J, Kellner CP. Minimally Invasive Surgery for  
315 Intracerebral Hemorrhage. *Current Neurology and Neuroscience Reports*  
316 2018;18 (6)(34).

317 4. Awad IA, Polster SP, Carrion-Penagos J, Thompson RE, Cao Y, Stadnik A, et al. Surgical  
318 Performance Determines Functional Outcome Benefit in the Minimally Invasive Surgery Plus  
319 Recombinant Tissue Plasminogen Activator for Intracerebral Hemorrhage Evacuation (MISTIE)  
320 Procedure. *Neurosurgery.* 2019;84(6):1157-68.

321 5. Al-Shahi Salman R, Law ZK, Bath PM, Steiner T, Sprigg N. Haemostatic therapies for acute  
322 spontaneous intracerebral haemorrhage. *The Cochrane database of systematic reviews.*  
323 2018;4:Cd005951.

324 6. Davis SM, Broderick J, Hennerici M, Brun NC, Dinger MN, Mayer SA, et al. Hematoma growth is  
325 a determinant of mortality and poor outcome after intracerebral hemorrhage. *Neurology.*  
326 2006;66(8):1175-81.

327 7. de Oliveira Manoel AL, Goffi A, Zampieri FG, Turkel-Parrella D, Duggal A, Marotta TR, et al. The  
328 critical care management of spontaneous intracranial hemorrhage: a contemporary review. *Critical care*  
329 *(London, England).* 2016;20:272-.

330 8. Maas MB, Rosenberg NF, Kosteva AR, Bauer RM, Guth JC, Liotta EM, et al. Surveillance  
331 neuroimaging and neurologic examinations affect care for intracerebral hemorrhage. *Neurology.*  
332 2013;81(2):107-12.

333 9. Korfhagen JJ, Kandadai MA, Clark JF, Adeoye O, Shaw GJ. A prototype device for non-invasive  
334 continuous monitoring of intracerebral hemorrhage. *J Neurosci Methods.* 2013;213(1):132-7.

335 10. Gabriel S, Lau RW, Gabriel C. The dielectric properties of biological tissues: II. Measurements in  
336 the frequency range 10 Hz to 20 GHz. *Phys Med Biol.* 1996;41(11):2251-69.

337 11. Griffiths DJ. *Introduction to Electrodynamics.* 4 ed. Cambridge: Cambridge University Press;  
338 2017.

339 12. Kothari RU, Brott T, Broderick JP, Barsan WG, Sauerbeck LR, Zuccarello M, et al. The ABCs of  
340 measuring intracerebral hemorrhage volumes. *Stroke.* 1996;27(8):1304-5.

341 13. Kandadai MA, Korfhagen JJ, Beiler S, Beiler C, Wagner K, Adeoye OM, et al. In vivo testing of a  
342 non-invasive prototype device for the continuous monitoring of intracerebral hemorrhage. *J Neurosci*  
343 *Methods.* 2014;235:117-22.

344 14. Klahr AC, Kate M, Kosior J, Buck B, Shuaib A, Emery D, et al. Early hematoma retraction in  
345 intracerebral hemorrhage is uncommon and does not predict outcome. *PLoS one.*  
346 2018;13(10):e0205436-e.

347

348

349

350

351

352

353

354
